# Supplementary material
Source: publisher site journal article supplement (https://www.dovepress.com/article/216088)
Supplement: Supplementary file 1 [file get_supplementary_file.php]

**Supplemental Material**

| **Table A1** Comparison of respondent characteristics between antihypertensive users versus non-users (N=1,661) | | | |
| --- | --- | --- | --- |
|  | **Respondents, No. (%)** | | **z-test (2-sided)** |
|  | **Antihypertensive users (n=505)** | **Antihypertensive non-users (n=1,151)** |  |
| **Sex** |  |  |  |
| Female | 363 (71.9) | 910 (79.1) | <.001 |
| Male | 125 (24.8) | 191 (16.6) | <.001 |
| Non-binary | 1 (0.2) | 2 (0.2) | 0.92 |
| Prefer not to answer/skipped | 16 (3.2) | 48 (4.2) |  |
| **Age, y** |  |  |  |
| 21 – 40 | 2 (0.4) | 92 (8.0) | <.001 |
| 41 – 50 | 20 (4.0) | 127 (11.0) | <.001 |
| 51 – 60 | 84 (16.6) | 306 (26.6) | <.001 |
| 61 – 70 | 214 (42.4) | 447 (38.8) | 0.18 |
| 71 – 80 | 147 (29) | 153 (13.3) | <.001 |
| ≥ 81 | 37 (7.3) | 22 (1.9) | <.001 |
| Skipped | 1 (0.2) | 4 (0.4) |  |
| **Race** |  |  |  |
| White | 443 (87.7) | 987 (85.8) | 0.28 |
| Asian | 7 (1.4) | 28 (2.4) | 0.92 |
| Black or African American | 5 (1.0) | 12 (1.0) | 0.17 |
| Other | 20 (4.0) | 49 (4.3) | 0.78 |
| Prefer not to answer/skipped | 30 (5.9) | 75 (6.5) |  |
| **Ethnicity** |  |  |  |
| Non-Hispanic ethnicity | 467 (92.5) | 1043 (90.6) | 0.32 |
| Hispanic ethnicity | 10 (1.0) | 32 (2.8) | 0.32 |
| Don’t know/prefer not to  answer/skipped | 28 (5.5) | 76 (6.6) |  |
| **Education** |  |  |  |
| High school graduate or lower | 35 (6.9) | 38 (3.3) | <.001 |
| Some college | 145 (28.7) | 261 (22.7) | 0.01 |
| College graduate | 109 (21.6) | 301 (26.2) | 0.05 |
| Some post-graduate | 59 (11.7) | 119 (10.3) | 0.42 |
| Post-graduate | 139 (27.5) | 391 (34.0) | 0.01 |
| Prefer not to answer/skipped | 18 (3.6) | 41 (3.6) |  |
| **Annual household income, $** |  |  |  |
| < 35,000 | 56 (11.1) | 95 (8.3) | 0.10 |
| 35,000 – 50,000 | 80 (15.8) | 108 (9.4) | <.001 |
| 50,000 – 75,000 | 100 (19.8) | 214 (18.6) | 0.77 |
| 75,000 – 100,000 | 90 (17.8) | 200 (17.4) | 0.95 |
| ≥ 100,000 | 94 (18.6) | 310 (30.4) | <.001 |
| Don’t know/prefer not to  answer/skipped | 85 (16.8) | 224 (19.5) |  |
